# Supplementary material for: A vivid example of turning waste into treasure: persistent luminescence of Ca2Ga2(Si,Ge)O7:Pr3+,Yb3+ phosphor tailored by band gap engineering
Source: Royal Society of Chemistry journal article supplement (doi:10.1039/c6tc03453e), 2016-01-01
Supplement: c6tc03453e1.pdf [file c6tc03453e1.pdf]

# A vivid example of turning waste into treasure: persistent luminescence of $\text{Ca}_2\text{Ga}_2(\text{Si,Ge})\text{O}_7\text{:Pr}^{3+},\text{Yb}^{3+}$ phosphor tailored by band gap engineering

Zehua Zou<sup>a</sup>, Hui Zhou<sup>a</sup>, Wenxiang Wang<sup>a</sup>, Jiachi Zhang<sup>\*a</sup>, Cheng Cao<sup>a</sup>, Teng Zhang<sup>a</sup>, Zhipeng Ci<sup>\*a</sup>, Zhengyan Zhao<sup>a</sup>, Yuhua Wang<sup>a</sup>

<sup>a</sup>, Key Laboratory for Magnetism Magnetic Materials of the Ministry of Education, Lanzhou University, Lanzhou 730000, P. R. China.

\*Corresponding author: zhangjch@lzu.edu.cn; cizhp@lzu.edu.cn

Tel.: +86-931-8912772, Fax: +86-931-8913554

## Supplementary Information

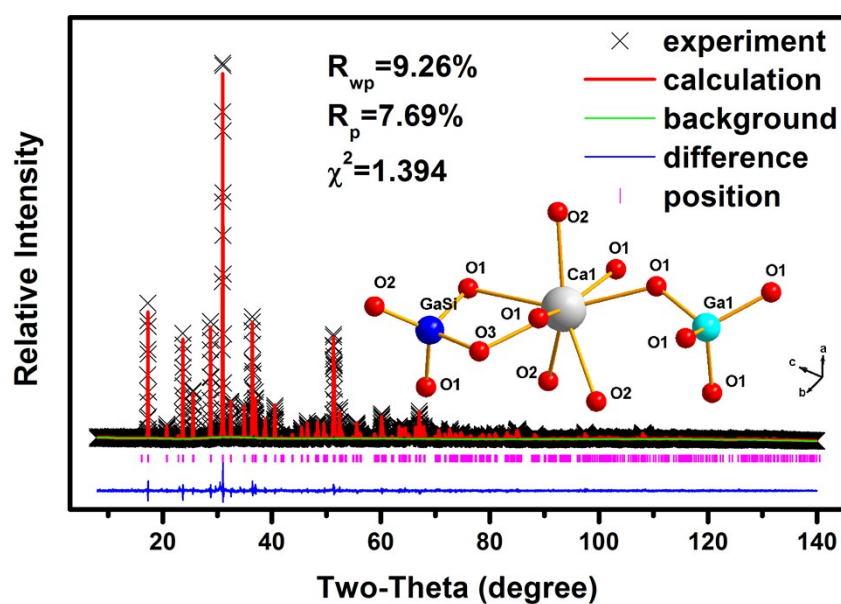

**Figure S1.** The Rietveld refinement of the powder XRD profile of the  $\text{Ca}_2\text{Ga}_2\text{SiO}_7$ .

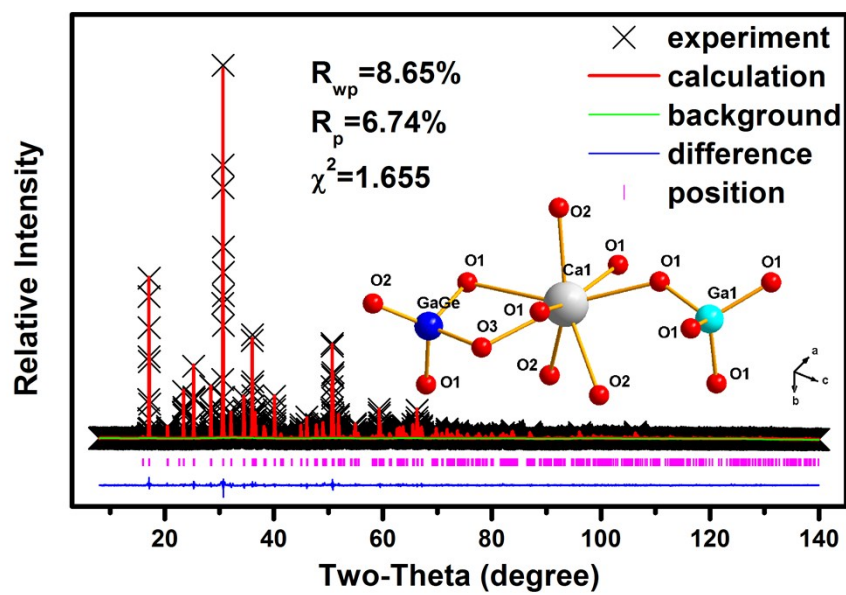

**Figure S2.** The Rietveld refinement of the powder XRD profile of the  $\text{Ca}_2\text{Ga}_2\text{GeO}_7$ .
